# Supplementary material for: Broad-Spectrum Resistance to Leaf Rust in the Argentinean Wheat Cultivar “Klein Proteo” Is Controlled by LrKP Located on Chromosome 2BS
Source: MDPI journal article supplement (doi:10.3390/agriculture12111836), 2022-11-02
Supplement: s1 [file s1]

Archive with 2 entries (2 files):
- agriculture-1908181-supplementary figures.pdf
- agriculture-1908181-supplementary tables.pdf
