# Supplementary material for: Broad-Spectrum Resistance to Leaf Rust in the Argentinean Wheat Cultivar “Klein Proteo” Is Controlled by LrKP Located on Chromosome 2BS
Source: MDPI journal article supplement (doi:10.3390/agriculture12111836), 2022-11-02
Supplement: s1 [file s1 › agriculture-1908181-supplementary tables.pdf]

**Table S1.** Primers used for identification of *Lr* genes in wheat cultivar “Klein Proteo”.

| <i>Lr</i> Gene                  | Primer name | Primer sequence (5'-3')       | Product size (bp) | Annealing T. (°C) |
|---------------------------------|-------------|-------------------------------|-------------------|-------------------|
| <i>Lr3</i>                      | Xmwg798F    | GGCTGTCTACATCTTCTGCA          | 365               | 58                |
|                                 | Xmwg798R    | CAAGTGTGAGAAGGAGAGT           |                   |                   |
| <i>Lr10</i>                     | Fl.2245     | GTGTAATGCATGCAGGTTCC          | 310               | 60                |
|                                 | Lr10-6/r2   | AGGTGTGAGTGAGTTATGTT          |                   |                   |
| <i>Lr13</i>                     | HBAU-Lr13 F | TGCACATGGATATGCGGAGA          | 431 <sup>a</sup>  | 55                |
|                                 | HBAU-Lr13 R | GCTTTGAGTTGCCCATGCTC          |                   |                   |
| <i>Lr13</i> (CDS <sup>1</sup> ) | Lr13F1      | GTGTACTTATTAATTCAGACATCATAAGG | 3555              | 55                |
|                                 | Lr13R1      | ACCATACAGCTATCTCAGGATA        |                   |                   |
| <i>Lr13</i> (CDS <sup>2</sup> ) | Lr13F5      | GCTCGGTCCTGTTGTGCCA           | 453               | 62                |
|                                 | Lr13R6      | GAGCAATTATCCGGCATTCTG         |                   |                   |

<sup>a</sup> the expected PCR product size before digestion, PCR products of the *HBAU-Lr13* marker were digested using restriction enzyme *HindIII*.

**Table S2.** Segregation of seedling reactions to the *Pt* pathotype PHQS in “Klein Proteo”, “Zhengzhou 5389”, and their selected F<sub>3:4</sub> lines.

| Material                      | Total | Infection types       |              |                        | Chi-square tests         |
|-------------------------------|-------|-----------------------|--------------|------------------------|--------------------------|
|                               |       | Homozygous Resistance | Heterozygous | Homozygous Susceptible |                          |
| Klein Proteo                  | 20    | 20                    |              |                        |                          |
| Zhengzhou 5389                | 20    |                       |              | 20                     |                          |
| KPZ-30 F <sub>3:4</sub> lines | 114   | 30                    | 55           | 29                     | $\chi^2_{1:2:1} = 0.158$ |

**Table S3.** Information of designated *Lr* genes on chromosome 2BS

| Gene        | Origen                | Marker                                                 | Reference            |
|-------------|-----------------------|--------------------------------------------------------|----------------------|
| <i>Lr13</i> | <i>T. aestivum</i>    | <i>HBAU-Lr13</i> (diagnostic marker)                   | Yan et al. [7]       |
| <i>Lr16</i> | <i>T. aestivum</i>    | <i>2BS-5175914_kwm849</i> (co-segregating marker)      | Kassa et al. [30]    |
| <i>Lr23</i> | <i>T. durum</i>       | <i>sun471</i> (co-segregating marker)                  | Chhetri et al.[31]   |
| <i>Lr35</i> | <i>Ae. speltoides</i> | <i>BCD260F1/35R2</i> (co-segregating marker)           | Seyfarth et al. [32] |
| <i>Lr48</i> | <i>T. aestivum</i>    | <i>IWB36920</i> (co-segregating marker)                | Nsabiyea et al. [33] |
| <i>Lr73</i> | <i>T. aestivum</i>    | <i>XwPt8760</i> and <i>wPt-4453</i> (flanking markers) | Park et al. [34]     |

**Table S4.** Information of 12 DEGs in the 114-168 Mb interval on chromosome 2B

| Gene ID<br>(CS RefSeq v1.1) | Reads Counts |             | Gene Description                                                 |
|-----------------------------|--------------|-------------|------------------------------------------------------------------|
|                             | R-bulk       | S-bulk      |                                                                  |
| TraesCS2B02G148500          | 76           | 2           | Lectin receptor kinase                                           |
| TraesCS2B02G181900          | 70.01400236  | 7.00210906  | 3-isopropylmalate dehydratase large subunit                      |
| <b>TraesCS2B02G182800</b>   | <b>2222</b>  | <b>690</b>  | <b>NBS-LRR disease resistance protein</b>                        |
| TraesCS2B02G152300          | 212.3721414  | 1243.90742  | Haloacid dehalogenase-like hydrolase domain-containing protein 3 |
| TraesCS2B02G156100          | 17.35019282  | 161.9945552 | N-alpha-acetyltransferase                                        |
| TraesCS2B02G160900          | 0            | 48.35694742 | ARM repeat superfamily protein                                   |
| TraesCS2B02G161000          | 0            | 108         | ARM repeat superfamily protein                                   |
| TraesCS2B02G163300          | 0            | 393         | Protein DETOXIFICATION                                           |
| TraesCS2B02G163800          | 3.174273137  | 114.6136807 | Calcium-binding protein 39                                       |
| TraesCS2B02G164100          | 7.361561896  | 66.42063856 | Mitochondrial inner membrane translocase subunit Tim44           |
| TraesCS2B02G164200          | 40           | 223         | BSD domain-containing protein 1                                  |
| TraesCS2B02G184100          | 11.07687143  | 99.36795167 | GTPase obg                                                       |
